# Supplementary material for: Folic acid modified Fe3O4 nanoclusters by a one-step ultrasonic technique for drug delivery and MR imaging
Source: Royal Society of Chemistry journal article supplement (doi:10.1039/c9ra09670a), 2020-01-01
Supplement: c9ra09670a1.pdf [file c9ra09670a1.pdf]

**Supporting information:**

**Folic acid modified Fe<sub>3</sub>O<sub>4</sub> nanoclusters by one-step ultrasonic technique for drug delivery and MR imaging**

Meng-Yu Fei<sup>a,†</sup>, Meng-Meng Song<sup>b,c,†</sup>, Pei Wang<sup>b,c</sup>, Gao-zong Pang<sup>b,c</sup>, Jing Chen<sup>bc</sup>,  
Da-Peng Lu<sup>d</sup>, Rui-Liu<sup>b</sup>, Gui-Yang Zhang<sup>b</sup>, Ting-Ting Zhao<sup>b</sup>, Yu-Xian Shen<sup>b,c,\*</sup> and  
Yong-Qiang Yu<sup>a,\*</sup>

<sup>a</sup>*The First Affiliated Hospital, Anhui Medical University, 218 Jixi Road, Hefei, Anhui, PR China.*

<sup>b</sup>*School of Basic Medical Sciences, Anhui Medical University, 81 Meishan Road, Hefei, Anhui, PR China.*

<sup>c</sup>*Biopharmaceutical Institute, Anhui Medical University, 81 Meishan Road, 230032 Hefei, China.*

<sup>d</sup>*School of pharmacy, Anhui Medical University, 81 Meishan Road, Hefei, Anhui, PR China.*

<sup>†</sup>These authors contributed equally to this work.

\*Correspondence: shenyx@ahmu.edu.cn, Tel.: +86-551-65113776; ayfyyuyongqiang@126.com

(Y. Y), Tel.: +86-551-62922381.

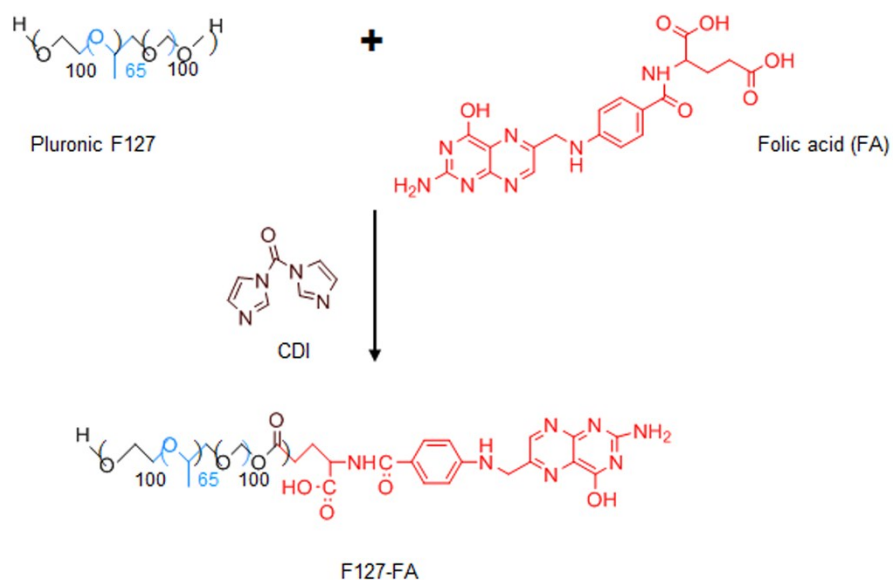

**Fig. S1** Schematic illustration of chemical reaction. The carboxylic group of folic acid react to one of a carbonyldiimidazone group of CDI, the remaining carbonyldiimidazone group reacted with the hydroxyl group of F127.

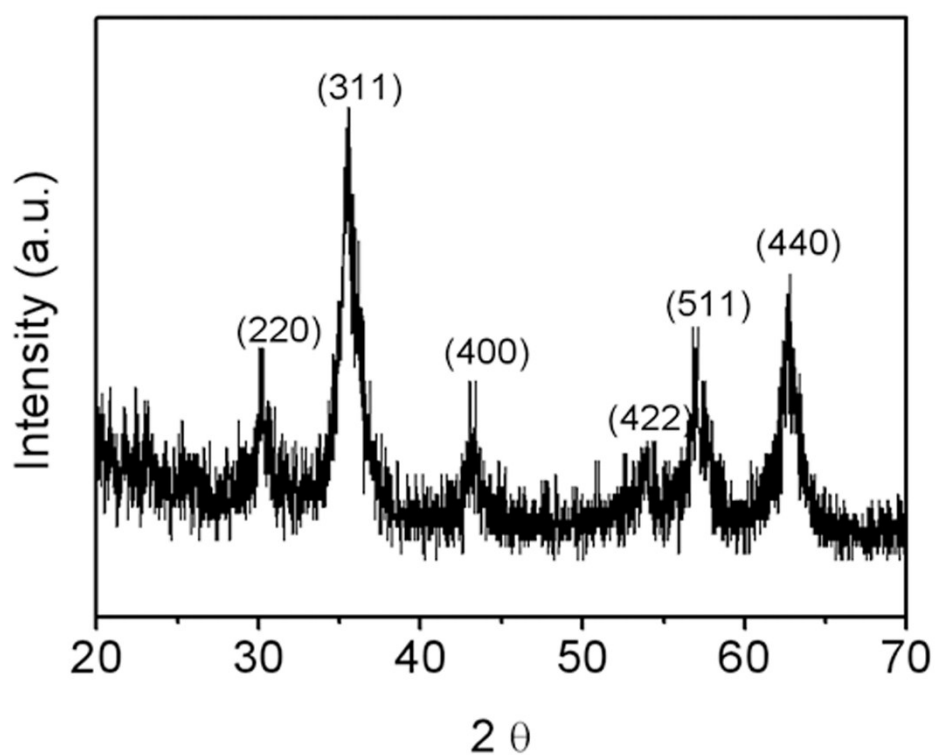

**Fig. S2** XRD pattern of Fe<sub>3</sub>O<sub>4</sub>@F127

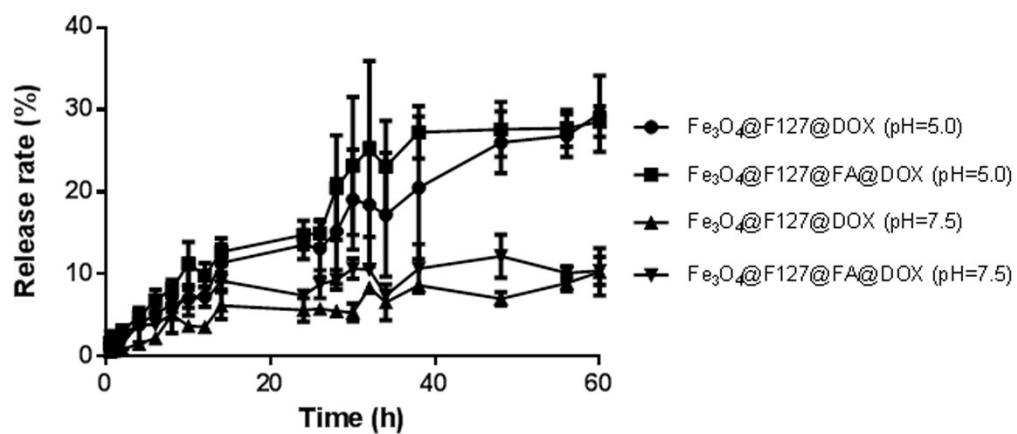

**Fig. S3** Release profiles of Fe<sub>3</sub>O<sub>4</sub>@F127@DOX and Fe<sub>3</sub>O<sub>4</sub>@F127@FA@DOX nanoclusters
